# Supplementary material for: Genetic analyses in mouse fibroblast and melanoma cells demonstrate novel roles for PDGF-AB ligand and PDGF receptor alpha
Source: PubMed Central journal article supplement (PMC7653911; doi:10.1038/s41598-020-75774-3), 2020-11-09
Supplement: 41598_2020_75774_MOESM1_ESM.pdf [file 41598_2020_75774_MOESM1_ESM.pdf]

Supplementary Figure S1, Full-length images of cropped immunoblots in figures

Figure 2a, M28-D5, PDGFR $\alpha$

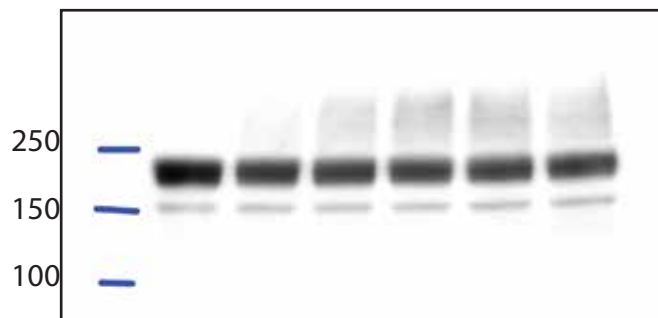

Figure 2b, 2054E, PDGFR $\alpha$

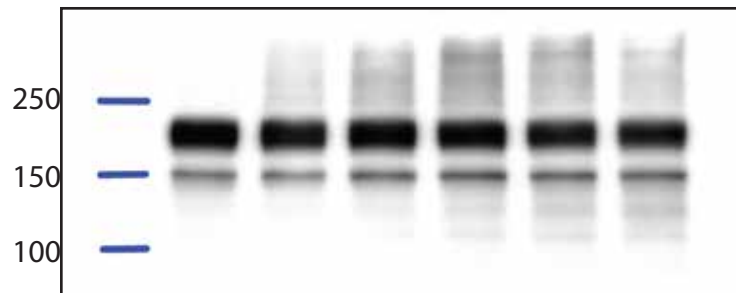

Figure 2a, M28-D5, PDGFR $\beta$

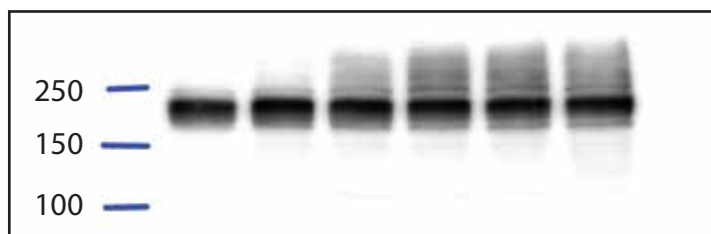

Figure 2b, 2054E, PDGFR $\beta$

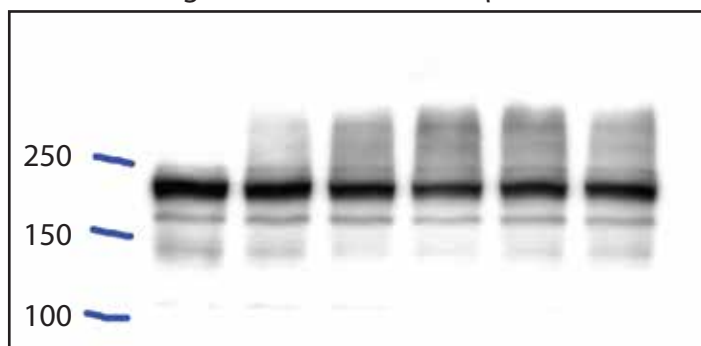

Figure 2a, M28-D5,  $\alpha$ -tubulin

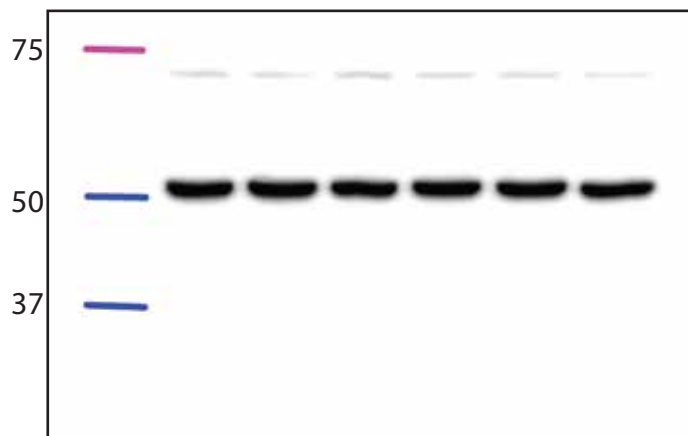

Figure 2b, 2054E,  $\alpha$ -tubulin

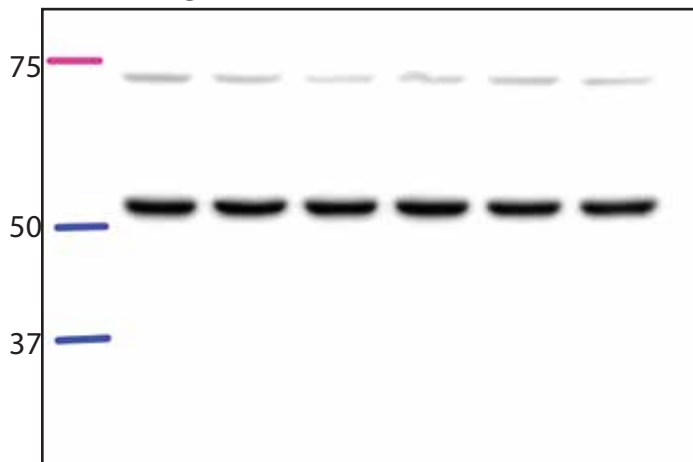

See Figure 2 in the main text for lane labels.

Supplementary Figure S1, Full-length images of cropped immunoblots in figures, continued

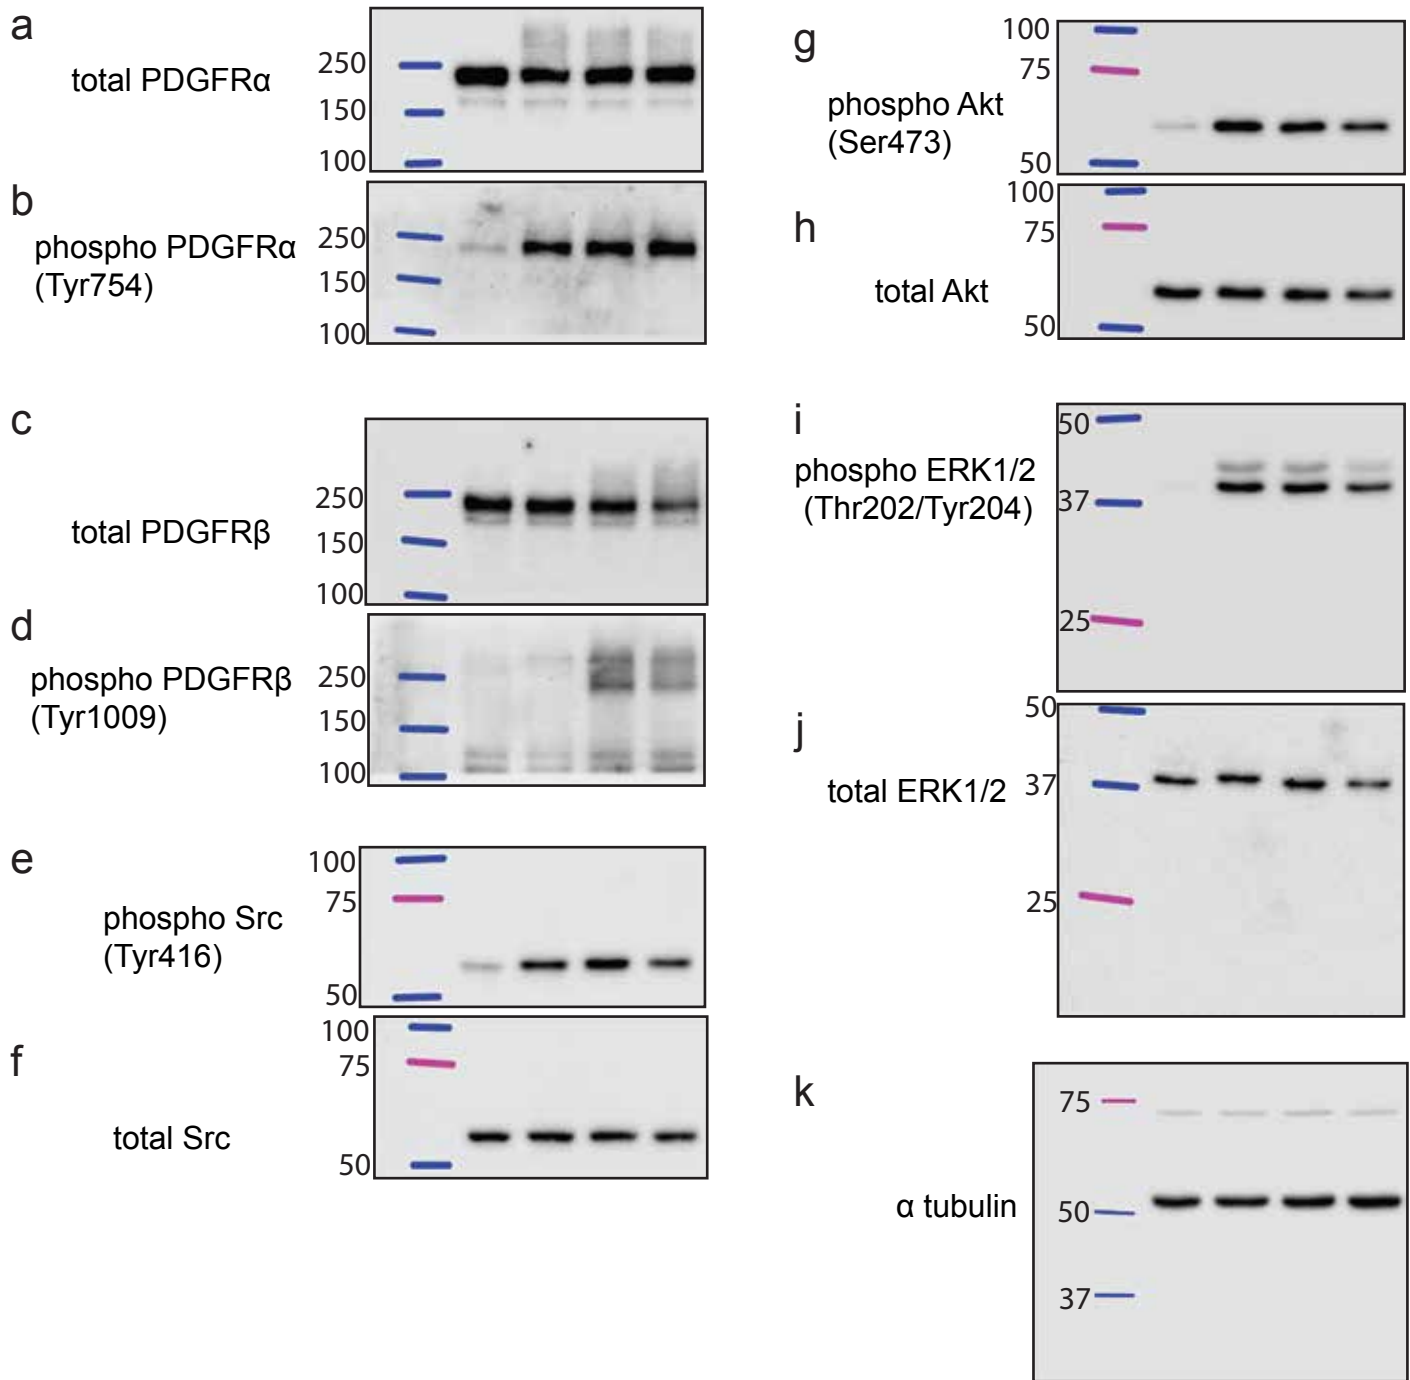

See Figure 3 in the main text for lane labels.

Supplementary Figure S1, Full-length images of cropped immunoblots in figures, continued

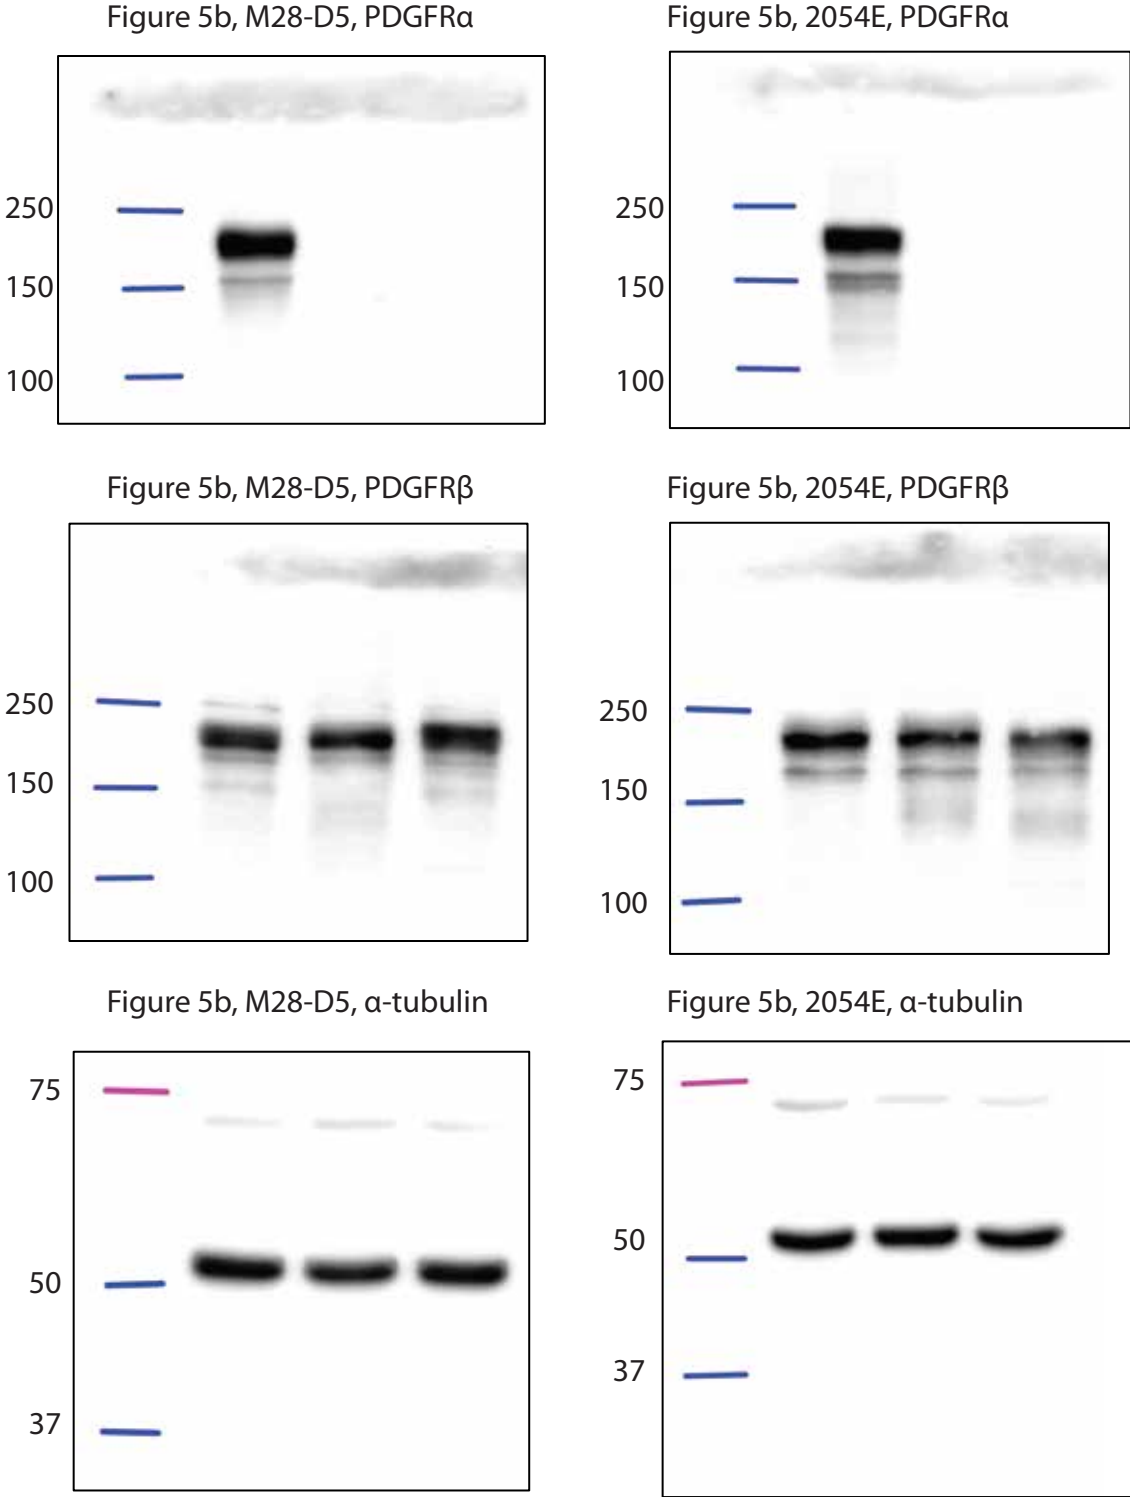

See Figure 5 in the main text for lane labels.

Supplementary Figure S1, Full-length images of cropped immunoblots in figures, continued

Figure 6a, M28-D5, PDGFR $\alpha$

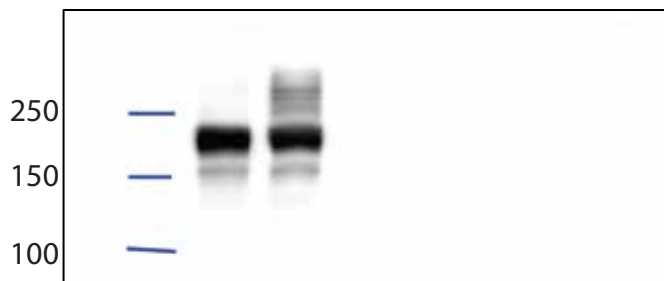

Figure 6b, 2054E, PDGFR $\alpha$

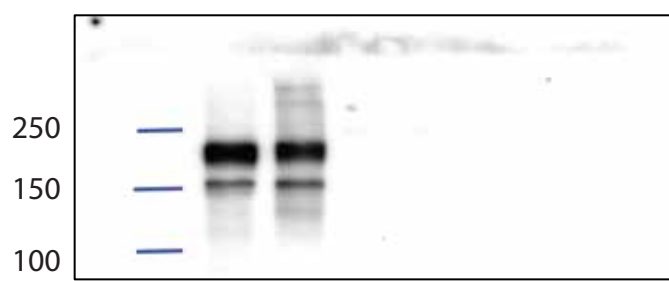

Figure 6a, M28-D5, PDGFR $\beta$

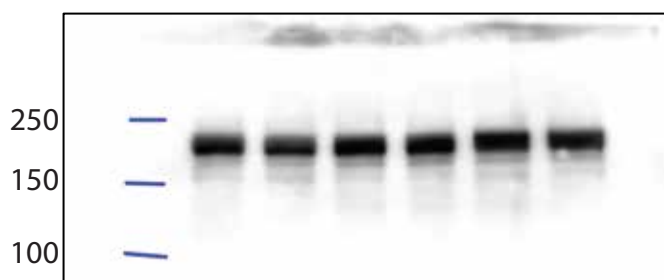

Figure 6b, 2054E, PDGFR $\beta$

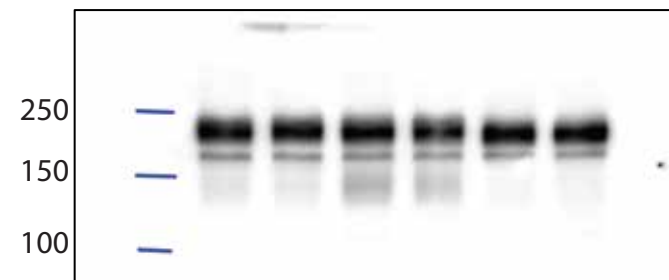

Figure 6a, M28-D5,  $\alpha$ -tubulin

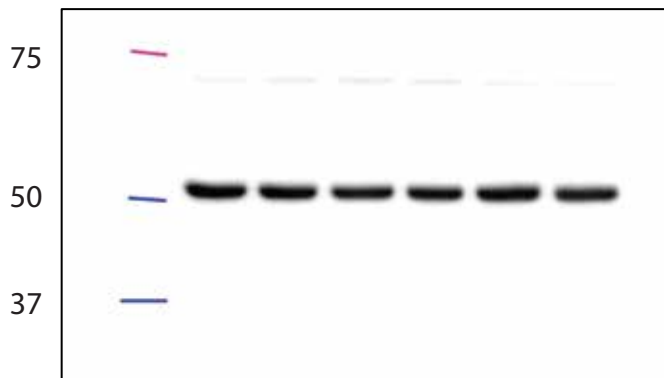

Figure 6b, 2054E,  $\alpha$ -tubulin

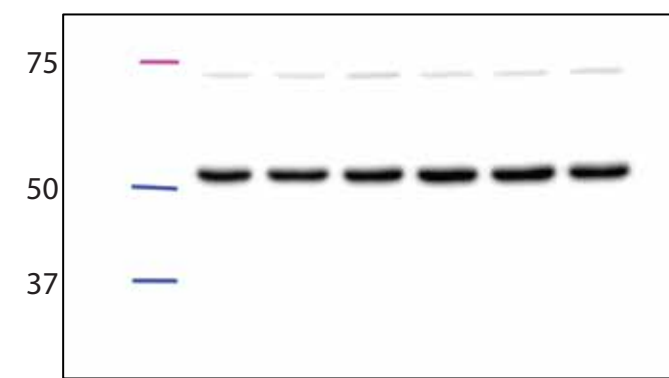

See Figure 6 in the main text for lane labels.

Supplementary Figure S1, Full-length images of cropped immunoblots in figures, continued

Figure 7a, M28-D5, PDGFR $\beta$

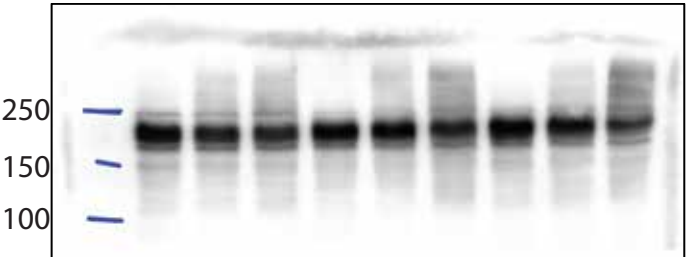

Figure 7b, 2054E, PDGFR $\beta$

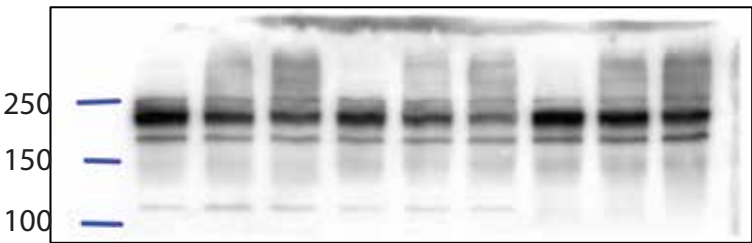

Figure 7a, M28-D5,  $\alpha$ -tubulin

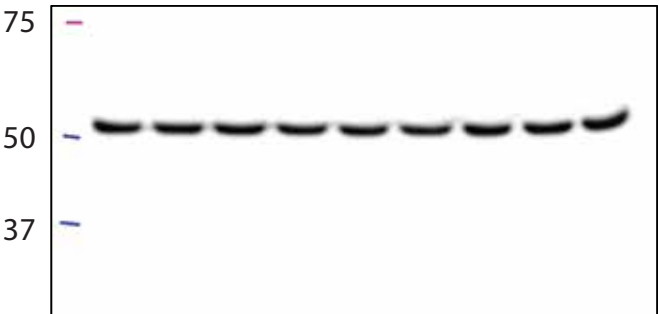

Figure 7b, 2054E,  $\alpha$ -tubulin

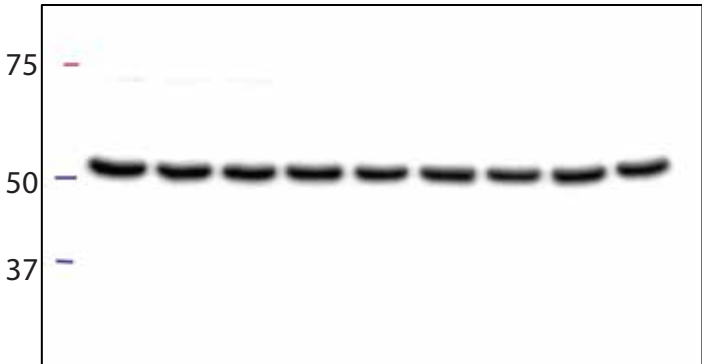

See Figure 7 in the main text for lane labels.

**Genetic analyses in mouse fibroblast and melanoma cells demonstrate novel roles for PDGF-AB ligand and PDGF Receptor alpha**

Julie L. Kadrmas<sup>1,2\*</sup>, Mary C. Beckerle<sup>1,3\*</sup> and Masaaki Yoshigi<sup>4\*</sup>

<sup>1</sup>Huntsman Cancer Institute, <sup>2</sup>Department of Oncological Sciences, <sup>3</sup>School of Biological Sciences, <sup>4</sup>Department of Pediatrics at the University of Utah, Salt Lake City, UT 84112

\* corresponding authors: [julie.kadrmas@hci.utah.edu](mailto:julie.kadrmas@hci.utah.edu), [masaaki.yoshigi@hsc.utah.edu](mailto:masaaki.yoshigi@hsc.utah.edu), [mary.beckerle@hci.utah.edu](mailto:mary.beckerle@hci.utah.edu)

**SUPPLEMENTARY INFORMATION**

Figures S1
